# Supplementary material
Source: PubMed Central journal article supplement (PMC3662974)
Supplement: NIHMS233968-supplement-Supplement1.pdf [file NIHMS233968-supplement-Supplement1.pdf]

## Supplementary Appendix

This appendix has been provided by the authors to give readers additional information about their work.

Supplement to: Appel LJ, Wright JT Jr, Greene T, et al. Intensive blood-pressure control in hypertensive chronic kidney disease. N Engl J Med 2010;363:918-29.

## Legend for Appendix Figures

Appendix Figure 1 – Participant flow in the trial and cohort phases of AASK

Appendix Figure 2 – Among participants with baseline  $UP/Cr \leq 0.22$ , BP levels in the usual BP group (light boxes) and lower BP group (dark boxes) over time in the trial and cohort phases of AASK among participants who had not yet experienced the primary study outcome (doubling of serum creatinine, ESRD or death). For each box, the upper edge corresponds to the 75<sup>th</sup> percentile and the bottom edge the 25<sup>th</sup> percentile. Note – All participants had at least 3 years of follow-up in the trial phase. The period between 3 and 6.5 years is a mixed period that is the trial phase for early enrollees and the cohort phase for the late enrollees. After 6.5 years, all data is from the cohort phase.

Appendix Figure 3 – Among participants with baseline  $UP/Cr > 0.22$ , BP levels in the usual BP group (light boxes) and lower BP group (dark boxes) over time in the trial and cohort phases of AASK among participants who had not yet experienced the primary study outcome (doubling of serum creatinine, ESRD or death). For each box, the upper edge corresponds to the 75<sup>th</sup> percentile and the bottom edge the 25<sup>th</sup> percentile. Note – All participants had at least 3 years of follow-up in the trial phase. The period between 3 and 6.5 years is a mixed period that is the trial phase for early enrollees and the cohort phase for the late enrollees. After 6.5 years, all data is from the cohort phase.

Appendix Figure 1

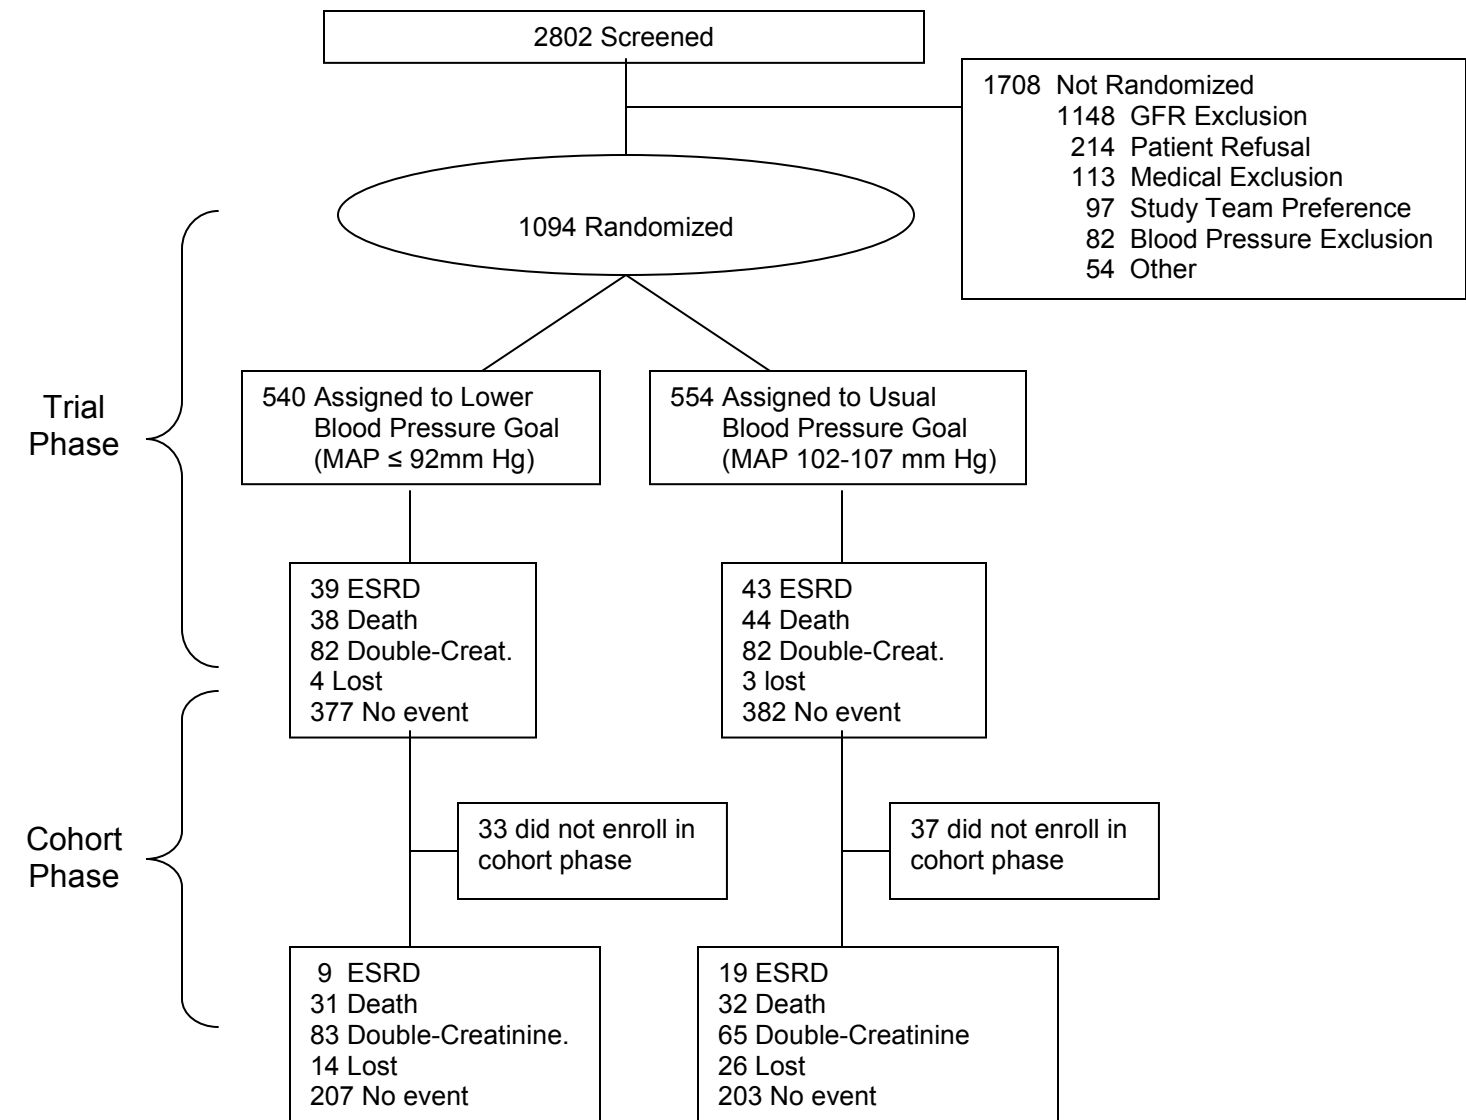

Appendix Figure 2

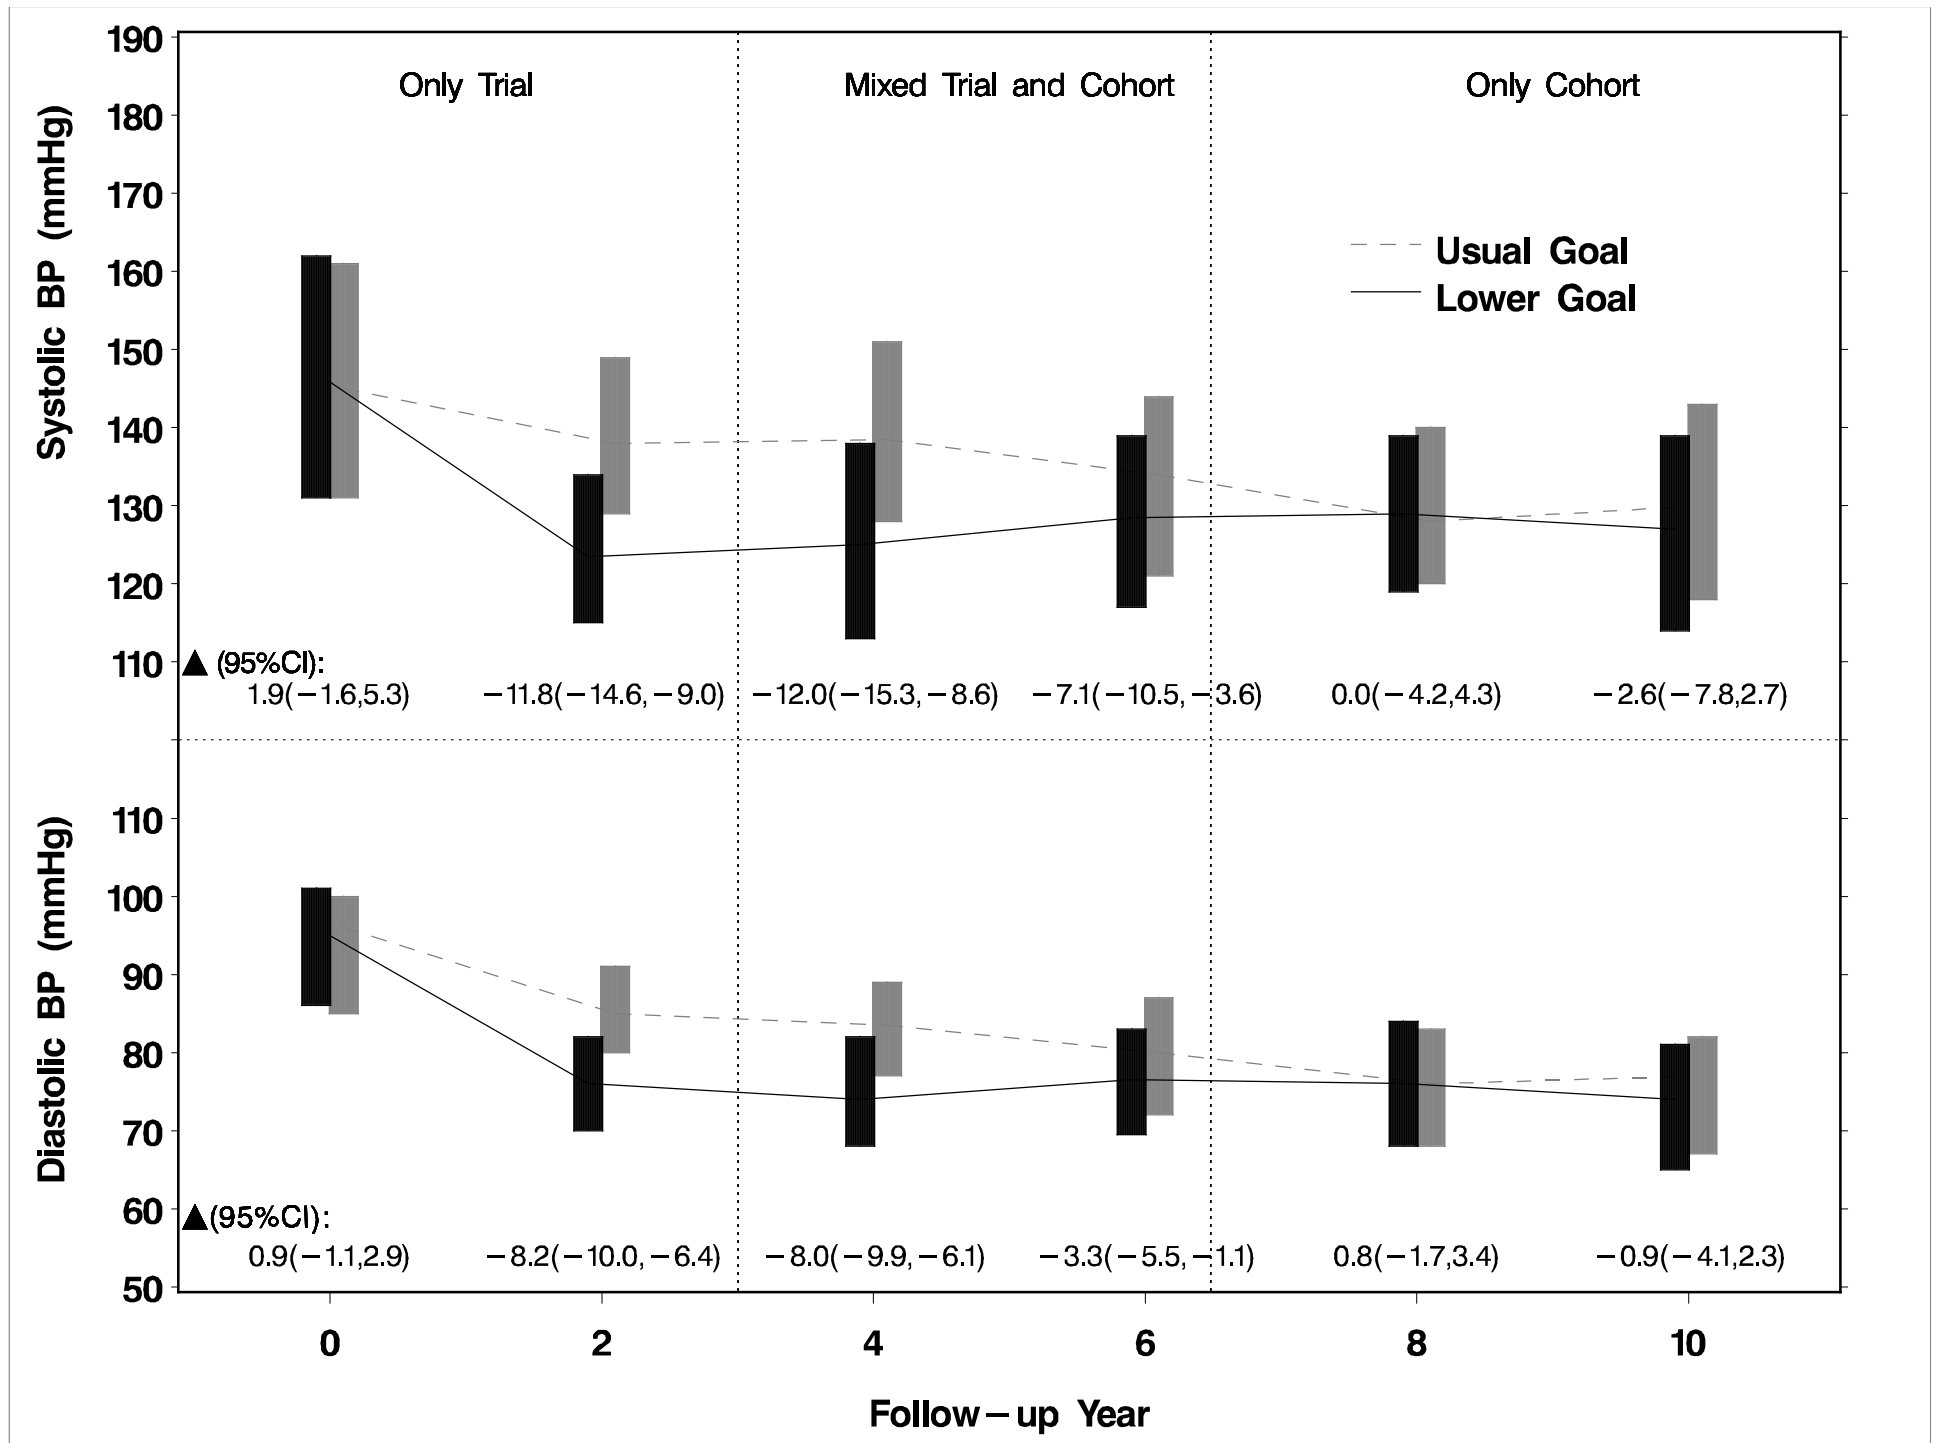

Appendix Figure 3

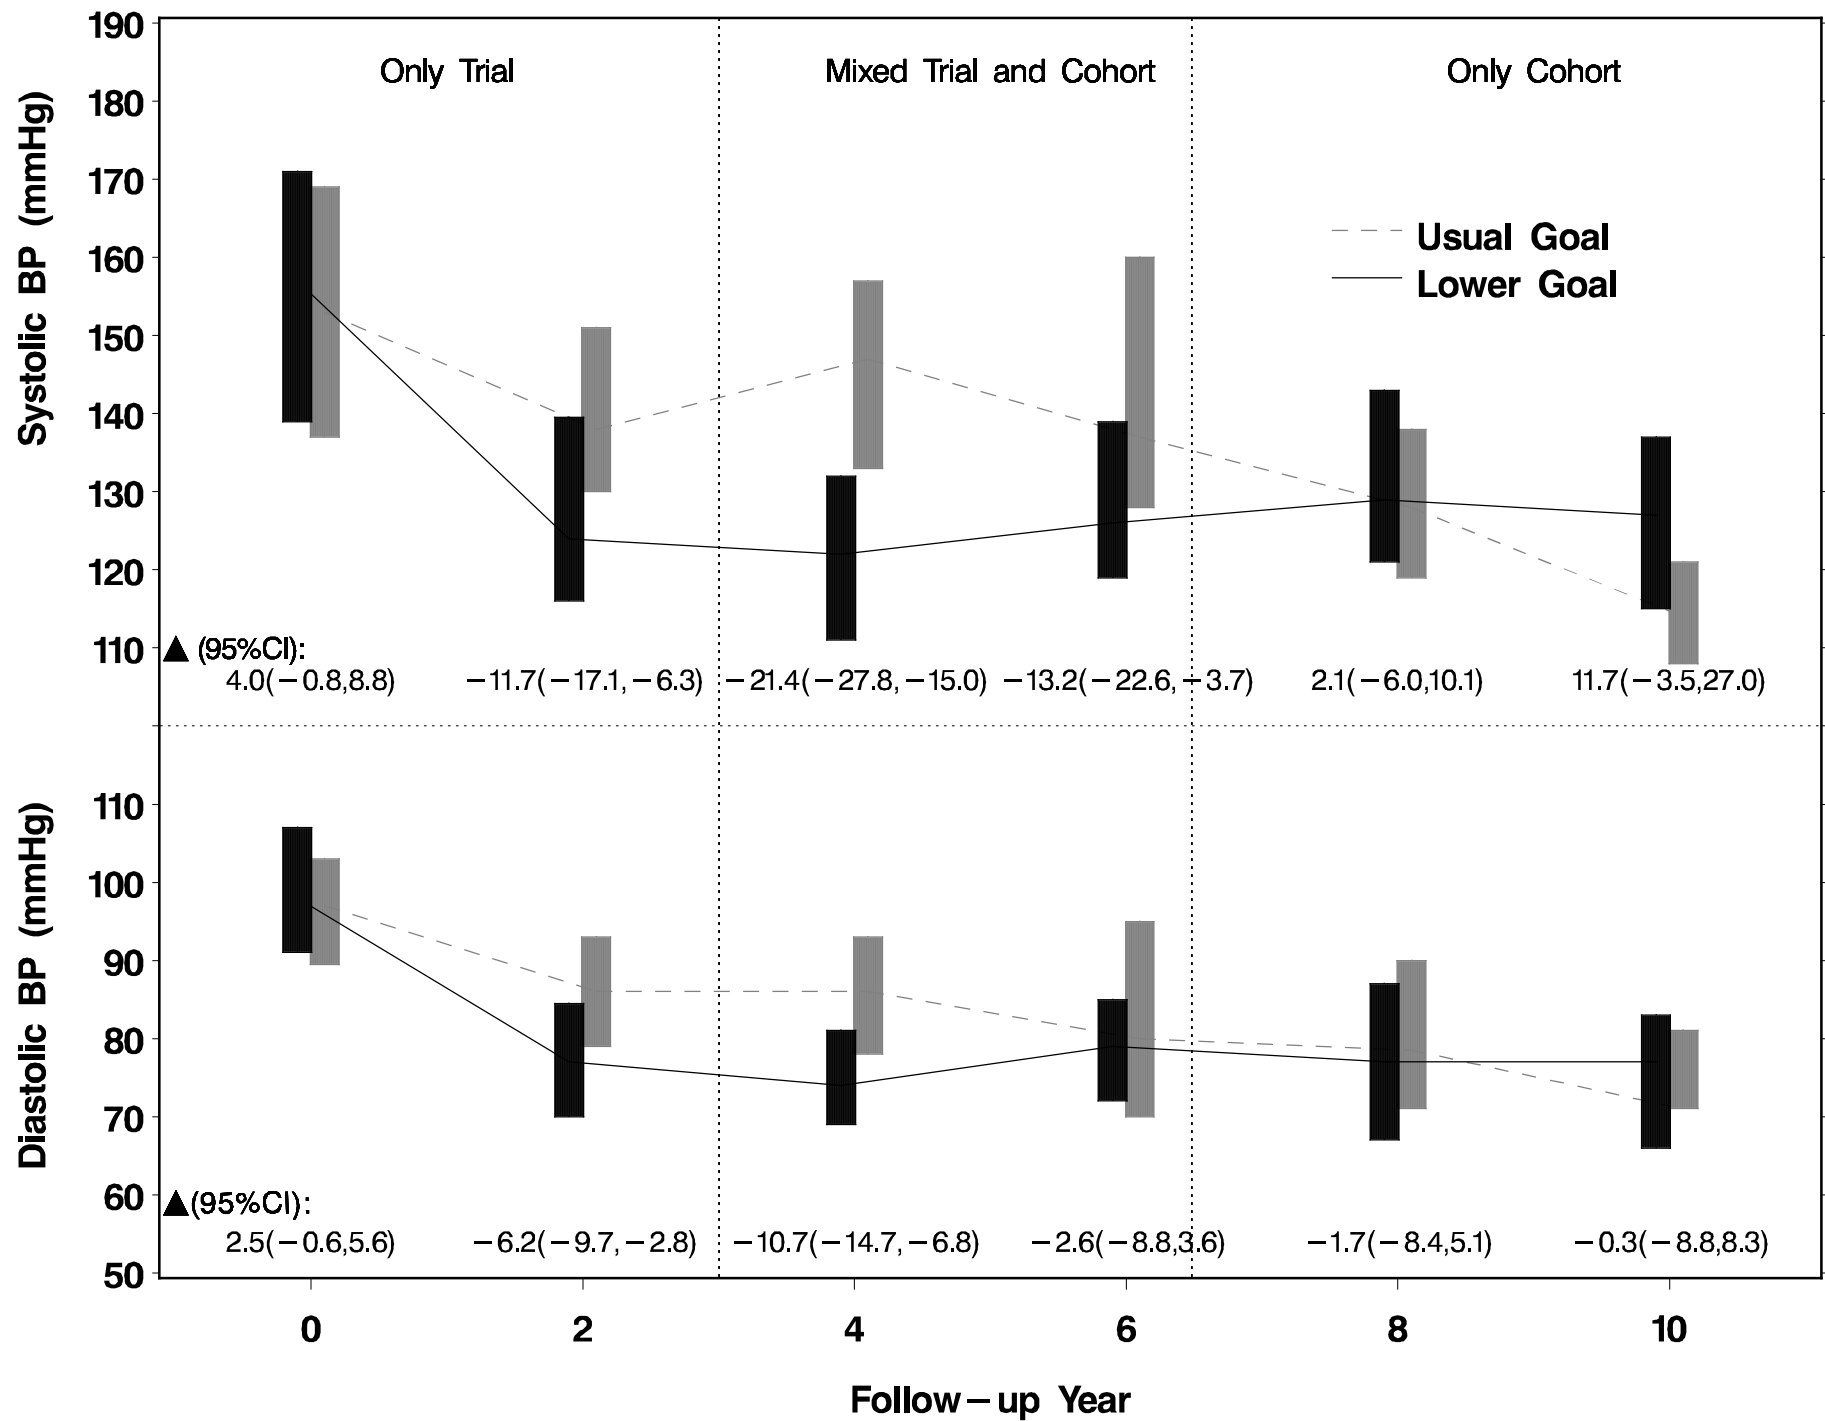

**Appendix Table 1: Characteristics of AASK Participants\* at Start of Cohort Phase by Randomized Group, Overall and Stratified by Baseline Urine Protein Excretion at Start of Trial**

| Variable                                  | All Participants |                 | UP≤0.22         |                 | UP>0.22         |                 |
|-------------------------------------------|------------------|-----------------|-----------------|-----------------|-----------------|-----------------|
|                                           | Lower Goal       | Usual Goal      | Lower Goal      | Usual Goal      | Lower Goal      | Usual Goal      |
|                                           | (N = 377)        | (N = 382)       | (N=290)         | (N=312)         | (N=86)          | (N=68)          |
| Age (yr)                                  | 60.5 ± 10.1      | 59.8 ± 10.3     | 61.8 ± 9.49     | 60.7 ± 9.64     | 56.3 ± 10.9     | 55.4 ± 12.1     |
| Female                                    | 145(38.5%)       | 152(39.8%)      | 119 (41.0%)     | 124 (39.7%)     | 26 (30.2%)      | 28 (41.2%)      |
| Current Smoker                            | 119(31.6%)       | 82 (21.5%)      | 90 (31.0%)      | 65 (20.8%)      | 28 (32.6%)      | 16 (23.5%)      |
| No High School Education                  | 156(41.4%)       | 153(40.2%)      | 124 (42.8%)     | 134 (43.1%)     | 32 (37.2%)      | 18 (26.5%)      |
| Weight(Kg)                                | 91.9 ± 22.7      | 92.1 ± 21.5     | 90.4 ± 22.5     | 91.1 ± 21.4     | 97.2 ± 22.8     | 96.6 ± 22.0     |
| Body Mass Index (kg/m <sup>2</sup> )      | 31.4 ± 7.34      | 31.5 ± 6.86     | 30.9 ± 7.05     | 31.3 ± 6.90     | 33.2 ± 8.11     | 32.6 ± 6.73     |
| Estimated GFR(ml/min/1.73m <sup>2</sup> ) | 47.0 ± 15.3      | 47.7 ± 15.0     | 49.1 ± 15.0     | 50.1 ± 14.0     | 39.4 ± 13.9     | 36.4 ± 14.1     |
| Serum Creatinine (mg/dL)                  | 1.99 ± 0.81      | 1.98 ± 0.80     | 1.87 ± 0.73     | 1.84 ± 0.68     | 2.44 ± 0.92     | 2.61 ± 0.98     |
| Urine Protein (g/day)                     | 0.07(0.04,0.25)  | 0.10(0.04,0.43) | 0.06(0.03,0.14) | 0.08(0.04,0.25) | 0.45(0.16,1.17) | 0.51(0.32,1.14) |
| U.Protein/Creatinine                      | 0.06(0.03,0.20)  | 0.07(0.03,0.29) | 0.04(0.02,0.09) | 0.05(0.03,0.17) | 0.35(0.11,0.80) | 0.42(0.21,0.98) |
| U.Protein/Creatinine > 0.22               | 82 (24.0%)       | 102(30.3%)      | 39 (14.7%)      | 61 (21.9%)      | 43 (58.1%)      | 41 (70.7%)      |
| Female                                    | 32 (24.6%)       | 38 (29.9%)      | 16 (15.1%)      | 21 (20.4%)      | 16 (66.7%)      | 17 (70.8%)      |
| Male                                      | 50 (23.7%)       | 64 (30.5%)      | 23 (14.4%)      | 40 (22.9%)      | 27 (54.0%)      | 24 (70.6%)      |

\*Among participants who had not experienced the primary renal outcome and who therefore remained at risk

**Appendix Table 2: BP Levels and Medication Usage Among those with UP/Cr  $\leq 0.22^*$**

|                                  |       | Year Post- Randomization |          |          |          |          |          |
|----------------------------------|-------|--------------------------|----------|----------|----------|----------|----------|
|                                  |       | Baseline                 | 2        | 4        | 6        | 8        | 10       |
| # Trial / # Cohort               |       |                          |          |          |          |          |          |
|                                  | Usual | 376/0                    | 326/0    | 214/32   | 44/155   | 0/185    | 0/107    |
|                                  | Lower | 357/0                    | 314/0    | 217/29   | 41/147   | 0/178    | 0/111    |
| Mean SBP                         |       |                          |          |          |          |          |          |
|                                  | Usual | 147(22)                  | 139(17)  | 139(17)  | 135(18)  | 131(20)  | 131(20)  |
|                                  | Lower | 149(25)                  | 127(19)  | 127(20)  | 128(16)  | 131(21)  | 128(20)  |
| Mean DBP                         |       |                          |          |          |          |          |          |
|                                  | Usual | 94(13)                   | 85(11)   | 83(10)   | 79(12)   | 76 (12)  | 75 (12)  |
|                                  | Lower | 95(14)                   | 77(13)   | 75(11)   | 76(10)   | 77 (13)  | 74 (12)  |
| % with SBP <130 and DBP <80 mmHg |       |                          |          |          |          |          |          |
|                                  | Usual | 9.8                      | 12.6     | 16.3     | 25.1     | 38.9     | 40.2     |
|                                  | Lower | 9.5                      | 51       | 53.7     | 44.1     | 39.9     | 48.6     |
| % with SBP <140 and DBP <90 mmHg |       |                          |          |          |          |          |          |
|                                  | Usual | 22.9                     | 40.5     | 43.5     | 61.8     | 73       | 70.1     |
|                                  | Lower | 22.7                     | 77.1     | 74       | 70.2     | 74.7     | 73       |
| % with SBP ≥160 and DBP≥100 mmHg |       |                          |          |          |          |          |          |
|                                  | Usual | 16.2                     | 3.4      | 2        | 2.5      | 3.2      | 0.9      |
|                                  | Lower | 19                       | 2.2      | 2.8      | 0.5      | 3.4      | 1.8      |
| % on ACEI or ARB                 |       |                          |          |          |          |          |          |
|                                  | Usual | 39.7                     | 39.3     | 47.6     | 82.9     | 90.3     | 82.2     |
|                                  | Lower | 42                       | 40.1     | 49.6     | 79.7     | 88.2     | 93.6     |
| # of HTN Med Classes             |       |                          |          |          |          |          |          |
|                                  | Usual | 2.3(1.1)                 | 2.6(1.2) | 3.0(1.4) | 3.6(1.5) | 3.9(1.5) | 3.8(1.5) |
|                                  | Lower | 2.4(1.1)                 | 3.4(1.1) | 3.5(1.1) | 3.6(1.4) | 3.7(1.4) | 4.1(1.3) |

\*During the trial phase, mean BP was 128/77 mmHg in the lower BP group and 140/85 mmHg in the usual BP group. During the cohort phase, mean BP was 133/78 mmHg in the lower BP group and 131/77 mmHg in the usual BP group.

**Appendix Table 3: BP Levels and Medication Usage Among those with UP/Cr > 0.22\***

|                                   |  | Year Post- Randomization |          |          |          |          |          |
|-----------------------------------|--|--------------------------|----------|----------|----------|----------|----------|
|                                   |  | Baseline                 | 2        | 4        | 6        | 8        | 10       |
| # Trial/ # Cohort                 |  |                          |          |          |          |          |          |
| Usual                             |  | 176/0                    | 121/0    | 56/7     | 2/28     | 0/22     | 0/9      |
| Lower                             |  | 181/0                    | 140/0    | 74/8     | 15/42    | 0/41     | 0/22     |
| Mean SBP                          |  |                          |          |          |          |          |          |
| Usual                             |  | 154(22)                  | 141(19)  | 147(19)  | 142(28)  | 129(12)  | 115(10)  |
| Lower                             |  | 158(24)                  | 130(25)  | 125(20)  | 129(17)  | 131(17)  | 127(21)  |
| Mean DBP                          |  |                          |          |          |          |          |          |
| Usual                             |  | 97(15)                   | 86(12)   | 87(11)   | 82(17)   | 78(12)   | 75(6)    |
| Lower                             |  | 99(15)                   | 80(16)   | 76(13)   | 80(12)   | 77(13)   | 74 (12)  |
| % with SBP <130 and DBP <80 mmHg  |  |                          |          |          |          |          |          |
| Usual                             |  | 5.7                      | 11.6     | 6.3      | 23.3     | 27.3     | 55.6     |
| Lower                             |  | 1.1                      | 51.4     | 59.8     | 42.1     | 36.6     | 45.5     |
| % with SBP <140 and DBP <90 mmHg  |  |                          |          |          |          |          |          |
| Usual                             |  | 14.2                     | 38       | 27       | 46.7     | 63.6     | 100      |
| Lower                             |  | 11.6                     | 72.1     | 78       | 77.2     | 68.3     | 77.3     |
| % with SBP ≥160 and DBP ≥100 mmHg |  |                          |          |          |          |          |          |
| Usual                             |  | 22.2                     | 5.8      | 7.9      | 13.3     | 0        | 0        |
| Lower                             |  | 29.3                     | 7.9      | 4.9      | 5.3      | 0        | 0        |
| % on ACEI or ARB                  |  |                          |          |          |          |          |          |
| Usual                             |  | 39.4                     | 42.1     | 52.4     | 76.7     | 95.5     | 100      |
| Lower                             |  | 34.6                     | 42.1     | 45.1     | 77.2     | 87.8     | 81.8     |
| # of HTN Med Classes              |  |                          |          |          |          |          |          |
| Usual                             |  | 2.5(1.2)                 | 3.0(1.2) | 3.0(1.2) | 3.7(1.3) | 4.0(1.8) | 4.2(1.9) |
| Lower                             |  | 2.5(1.2)                 | 3.7(1.1) | 3.7(1.1) | 4.0(1.2) | 4.1(1.2) | 4.5(1.2) |

\*During the trial phase, mean BP was 132/81 mmHg in the lower BP group and 144/87 mmHg in the usual BP group. During the cohort phase, mean BP was 132/80 mmHg in the lower BP group and 139/83 mmHg in the usual BP group.



**Appendix Table 4: Mortality, CVD Events, and Hospitalizations by Randomized Group, All Participants**

|                                             | Lower Goal |      | Usual Goal |      | Lower vs Usual*   |         |
|---------------------------------------------|------------|------|------------|------|-------------------|---------|
|                                             | # events   | Rate | # events   | Rate | HR                | P-value |
| Total Mortality                             |            |      |            |      |                   |         |
| Trial Phase                                 | 44/540     | 1.8  | 61/554     | 2.4  | 0.71 (0.48,1.05)  | 0.09    |
| Cohort Phase                                | 81/492     | 3.5  | 68/490     | 3    | 1.14 (0.82,1.57)  | 0.44    |
| Both                                        | 125/540    | 2.6  | 129/554    | 2.7  | 0.94 (0.73,1.20)  | 0.62    |
| CV Death                                    |            |      |            |      |                   |         |
| Trial Phase                                 | 16/540     | 0.7  | 15/554     | 0.6  | 1.00 (0.49,2.02)  | 0.99    |
| Cohort Phase                                | 19/350     | 1.3  | 9/341      | 0.6  | 1.86 (0.84,4.13)  | 0.13    |
| Both                                        | 35/540     | 0.9  | 24/554     | 0.6  | 1.32 (0.78,2.23)  | 0.3     |
| CV Composite                                |            |      |            |      |                   |         |
| Trial Phase                                 | 71/540     | 3.2  | 78/554     | 3.5  | 0.87 (0.63,1.21)  | 0.41    |
| Cohort Phase                                | 45/322     | 3.4  | 31/307     | 2.6  | 1.22 (0.77,1.94)  | 0.39    |
| Both                                        | 116/540    | 3.3  | 109/554    | 3.2  | 0.98 (0.75,1.27)  | 0.87    |
| Stroke Event                                |            |      |            |      |                   |         |
| Trial Phase                                 | 26/540     | 1.1  | 29/554     | 1.3  | 0.87 (0.51,1.47)  | 0.6     |
| Cohort Phase                                | 15/337     | 1.1  | 15/327     | 1.1  | 0.87 (0.43,1.79)  | 0.71    |
| Both                                        | 41/540     | 1.1  | 44/554     | 1.2  | 0.87 (0.57,1.33)  | 0.52    |
| Heart Failure Event                         |            |      |            |      |                   |         |
| Trial Phase                                 | 27/540     | 1.2  | 23/554     | 1    | 1.11 (0.63,1.94)  | 0.71    |
| Cohort Phase                                | 22/341     | 1.5  | 17/329     | 1.3  | 1.13 (0.60,2.14)  | 0.71    |
| Both                                        | 49/540     | 1.3  | 40/554     | 1.1  | 1.12 (0.73,1.71)  | 0.6     |
| Major CAD Event                             |            |      |            |      |                   |         |
| Trial Phase                                 | 19/540     | 0.8  | 23/554     | 1    | 0.80 (0.44,1.48)  | 0.48    |
| Cohort Phase                                | 18/339     | 1.3  | 7/329      | 0.5  | 2.29 (0.95,5.50)  | 0.06    |
| Both                                        | 37/540     | 1    | 30/554     | 0.8  | 1.16 (0.71,1.88)  | 0.55    |
| Overall rate of CV Events                   |            |      |            |      |                   |         |
| Trial Phase                                 | 108/540    | 4.1  | 94/554     | 3.5  | 1.11(0.78 ,1.56)  | 0.57    |
| Cohort Phase                                | 70/350     | 4.7  | 58/341     | 4.1  | 1.08(0.72 ,1.70)  | 0.74    |
| Both                                        | 178/540    | 4.6  | 152/554    | 4    | 1.03 (0.89,1.20)  | 0.55    |
| First hospitalization (any cause)           |            |      |            |      |                   |         |
| Trial Phase                                 | 256/540    | 15.3 | 256/554    | 14.3 | 1.05 (0.88,1.24)  | 0.62    |
| Cohort Phase                                | 84/205     | 11.8 | 77/201     | 11.4 | 0.99 (0.73,1.35)  | 0.95    |
| Both                                        | 340/540    | 14.3 | 332/554    | 13.4 | 1.03 (0.89,1.20)  | 0.67    |
| Overall rate of hospitalization (any cause) |            |      |            |      |                   |         |
| Trial Phase                                 | 518/540    | 19.9 | 519/554    | 19.4 | 0.98 ( 0.81 ,1.2) | 0.87    |
| Cohort Phase                                | 321/350    | 21.6 | 352/341    | 25.1 | 0.83(0.77 ,1.26)  | 0.13    |
| Both                                        | 839/540    | 21.9 | 870/540    | 23.1 | 0.92(0.78 ,1.08)  | 0.32    |

**Appendix Table 5: Mortality, CVD Events, and Hospitalizations by Randomized Group, UP/Cr  $\leq 0.22$** 

|                                             | <b>Lower Goal</b> |             | <b>Usual Goal</b> |             | <b>Lower vs Usual*</b> |                |
|---------------------------------------------|-------------------|-------------|-------------------|-------------|------------------------|----------------|
|                                             | <b># events</b>   | <b>Rate</b> | <b># events</b>   | <b>Rate</b> | <b>HR</b>              | <b>P-value</b> |
| Total Mortality                             |                   |             |                   |             |                        |                |
| Trial Phase                                 | 23/357            | 1.4         | 34/376            | 1.9         | 0.66 (0.39,1.12)       | 0.12           |
| Cohort Phase                                | 52/331            | 3.3         | 46/339            | 3           | 1.09 (0.73,1.62)       | 0.68           |
| Both                                        | 75/357            | 2.3         | 80/376            | 2.4         | 0.91 (0.66,1.24)       | 0.54           |
| CV Death                                    |                   |             |                   |             |                        |                |
| Trial Phase                                 | 10/357            | 0.6         | 9/376             | 0.5         | 1.14 (0.46,2.81)       | 0.78           |
| Cohort Phase                                | 17/266            | 1.5         | 7/274             | 0.6         | 2.31 (0.95,5.60)       | 0.06           |
| Both                                        | 27/357            | 1           | 16/376            | 0.5         | 1.66 (0.89,3.09)       | 0.11           |
| CV Composite                                |                   |             |                   |             |                        |                |
| Trial Phase                                 | 43/357            | 2.8         | 49/376            | 3           | 0.88 (0.58,1.33)       | 0.54           |
| Cohort Phase                                | 38/245            | 3.7         | 25/247            | 2.4         | 1.44 (0.87,2.39)       | 0.16           |
| Both                                        | 81/357            | 3.1         | 74/376            | 2.8         | 1.07 (0.78,1.47)       | 0.66           |
| Stroke Event                                |                   |             |                   |             |                        |                |
| Trial Phase                                 | 20/357            | 1.3         | 22/376            | 1.3         | 0.93 (0.50,1.70)       | 0.8            |
| Cohort Phase                                | 12/254            | 1.1         | 13/262            | 1.2         | 0.89 (0.40,1.95)       | 0.77           |
| Both                                        | 32/357            | 1.2         | 35/376            | 1.3         | 0.91 (0.56,1.47)       | 0.7            |
| Heart Failure Event                         |                   |             |                   |             |                        |                |
| Trial Phase                                 | 12/357            | 0.7         | 11/376            | 0.6         | 1.12 (0.49,2.54)       | 0.79           |
| Cohort Phase                                | 17/261            | 1.5         | 13/268            | 1.1         | 1.32 (0.64,2.72)       | 0.46           |
| Both                                        | 29/357            | 1.1         | 24/376            | 0.8         | 1.23 (0.71,2.11)       | 0.46           |
| Major CAD Event                             |                   |             |                   |             |                        |                |
| Trial Phase                                 | 11/357            | 0.7         | 15/376            | 0.9         | 0.73 (0.33,1.60)       | 0.43           |
| Cohort Phase                                | 16/259            | 1.4         | 6/264             | 0.5         | 2.62 (1.02,6.72)       | 0.05           |
| Both                                        | 27/357            | 1           | 21/376            | 0.7         | 1.28 (0.72,2.28)       | 0.39           |
| Overall rate of CV Events                   |                   |             |                   |             |                        |                |
| Trial Phase                                 | 66/357            | 3.8         | 61/376            | 3.4         | 1.11(0.72 ,1.73)       | 0.63           |
| Cohort Phase                                | 54/266            | 4.6         | 47/266            | 3.9         | 1.13(0.68 ,1.82)       | 0.63           |
| Both                                        | 120/357           | 4.3         | 108/376           | 3.7         | 1.12(0.79 ,1.58)       | 0.52           |
| First hospitalization (any cause)           |                   |             |                   |             |                        |                |
| Trial Phase                                 | 163/357           | 13.9        | 168/376           | 12.8        | 1.08 (0.87,1.34)       | 0.5            |
| Cohort Phase                                | 66/158            | 11.8        | 61/160            | 10.7        | 1.08 (0.76,1.53)       | 0.67           |
| Both                                        | 229/357           | 13.2        | 228/376           | 12.1        | 1.08 (0.90,1.30)       | 0.43           |
| Overall rate of hospitalization (any cause) |                   |             |                   |             |                        |                |
| Trial Phase                                 | 302/357           | 17.6        | 336/376           | 18.5        | 0.94(0.73 ,1.21)       | 0.63           |
| Cohort Phase                                | 257/266           | 22          | 276/266           | 23.1        | 0.94(0.73 ,1.21)       | 0.66           |
| Both                                        | 559/357           | 20          | 611/376           | 20.9        | 0.94(0.78 ,1.14)       | 0.55           |

**Appendix Table 6: Mortality, CVD Events, and Hospitalizations by Randomized Group, UP>0.22**

|                                             | Lower Goal |      | Usual Goal |      | Lower vs Usual*  |         |
|---------------------------------------------|------------|------|------------|------|------------------|---------|
|                                             | # events   | Rate | # events   | Rate | HR               | P-value |
| Total Mortality                             |            |      |            |      |                  |         |
| Trial Phase                                 | 21/181     | 2.5  | 27/176     | 3.4  | 0.72 (0.41,1.29) | 0.27    |
| Cohort Phase                                | 29/159     | 4    | 21/149     | 3.1  | 1.32 (0.74,2.33) | 0.34    |
| Both                                        | 50/181     | 3.2  | 48/176     | 3.3  | 0.98 (0.65,1.46) | 0.91    |
| CV Death                                    |            |      |            |      |                  |         |
| Trial Phase                                 | 6/181      | 0.8  | 6/176      | 1    | 0.90 (0.28,2.85) | 0.86    |
| Cohort Phase                                | 2/83       | 0.6  | 2/66       | 1    | 0.69 (0.09,5.08) | 0.72    |
| Both                                        | 8/181      | 0.8  | 8/176      | 1    | 0.84 (0.31,2.30) | 0.73    |
| CV Composite                                |            |      |            |      |                  |         |
| Trial Phase                                 | 27/181     | 4.1  | 29/176     | 4.9  | 0.82 (0.48,1.40) | 0.46    |
| Cohort Phase                                | 7/76       | 2.5  | 6/59       | 3.3  | 0.61 (0.20,1.87) | 0.39    |
| Both                                        | 34/181     | 3.6  | 35/176     | 4.5  | 0.79 (0.49,1.28) | 0.34    |
| Stroke Event                                |            |      |            |      |                  |         |
| Trial Phase                                 | 6/181      | 0.9  | 7/176      | 1.1  | 0.69 (0.23,2.09) | 0.51    |
| Cohort Phase                                | 3/82       | 1    | 2/64       | 1    | 0.69 (0.10,4.50) | 0.69    |
| Both                                        | 9/181      | 0.9  | 9/176      | 1.1  | 0.71 (0.28,1.84) | 0.48    |
| Heart Failure Event                         |            |      |            |      |                  |         |
| Trial Phase                                 | 14/181     | 2    | 12/176     | 2    | 1.00 (0.45,2.20) | 1       |
| Cohort Phase                                | 5/79       | 1.7  | 4/60       | 2.1  | 0.68 (0.18,2.64) | 0.58    |
| Both                                        | 19/181     | 1.9  | 16/176     | 2    | 0.92 (0.46,1.82) | 0.8     |
| Major CAD Event                             |            |      |            |      |                  |         |
| Trial Phase                                 | 7/181      | 1    | 8/176      | 1.3  | 0.75 (0.26,2.12) | 0.58    |
| Cohort Phase                                | 2/79       | 0.7  | 1/64       | 0.5  | 0.41 (0.03,6.54) | 0.53    |
| Both                                        | 9/181      | 0.9  | 9/176      | 1.1  | 0.76 (0.29,2.00) | 0.58    |
| Overall rate of CV Events                   |            |      |            |      |                  |         |
| Trial Phase                                 | 41/181     | 4.7  | 33/176     | 3.8  | 1.05(0.6,1.83)   | 0.86    |
| Cohort Phase                                | 16/83      | 5.1  | 11/66      | 5.4  | 0.95(0.44,2.52)  | 0.91    |
| Both                                        | 57/181     | 5.5  | 44/176     | 5.3  | 1.01(0.60,1.70)  | 0.97    |
| First hospitalization (any cause)           |            |      |            |      |                  |         |
| Trial Phase                                 | 92/181     | 18.5 | 87/176     | 18.4 | 1.00 (0.74,1.35) | 0.9997  |
| Cohort Phase                                | 17/46      | 11.4 | 16/40      | 15.2 | 0.67 (0.34,1.35) | 0.266   |
| Both                                        | 109/181    | 16.9 | 103/176    | 17.8 | 0.95 (0.72,1.25) | 0.7252  |
| Overall rate of hospitalization (any cause) |            |      |            |      |                  |         |
| Trial Phase                                 | 214/181    | 24.3 | 182/176    | 21.2 | 1.1(0.8,1.52)    | 0.55    |
| Cohort Phase                                | 63/83      | 20.2 | 76/66      | 37.1 | 0.54 (0.58,2.1)  | 0.06    |
| Both                                        | 277/181    | 27   | 258/176    | 30.9 | 0.91(0.66,1.26)  | 0.58    |
